# Supplementary material for: Isoserine-based biotinylated photoaffinity probes that interact with penicillin-binding protein 1bElectronic supplementary information (ESI) available: spectroscopic characterization for all new compounds. Fig. S1: decrease in absorbance at 366 nm as a function of irradiation time for 1b. See http://www.rsc.org/suppdata/cc/b2/b204007g/
Source: Royal Society of Chemistry journal article supplement (doi:10.1039/b204007g), 2002-07-02
Supplement: b204007g.doc [file b204007g.doc]

Supplementary Material (ESI) for Chemical Communications

This journal is © The Royal Society of Chemistry 2002

Analytical data:

All new compounds were fully analyzed by 1H and 13C NMR spectra. High resolution MS data: **1b**, C30H42F3N7O9S, m/z = 734.27933, calc 734.27896 [M+H]+, 756.26049, calc 756.26090 [M+Na]+, 772.23520, calc 772.23484 [M+K]+; **1d**, C116H162F3N18O47PS2, m/z = 902.65890, calc 902.65842 [M-3H]-3, 1354.48857, calc 1354.49131, [M-2H]-2; **1e**, C34H50F3N7O10S, m/z = 806.33758, calc 806.33647 [M+H]+ 828.31877; calc 828.31842 [M+Na]+; 844.29311, calc 844.29235 [M+K]+; **1f**, C120H170F3N18O48PS2, m/z = 926.67882, calc 926.67759 [M-3H]-3, 1390.53035, calc 1390.52002 [M-2H]-2; **2a**, C31H46F3N5O10S, m/z = 738.29882, calc 738.29902 [M+H]+ , 760.28164, calc 760.28097 [M+Na]+; **2b**, C35H54F3N5O11S, m/z = 810.35789, calc 810.35654 [M+H]+; **3**, C11H13F3O3, m/z = 273.07128, calc 273.07090 [M+Na]+; 523.15323, calc 523.15258 [2M+Na]+; **4a**, C24H44N6O7S, m/z = 561.30672, calc 561.30649 [M+H]+, 583.28848, calc 583.28844 [M+Na]+, 1143.58874, calc 1143.58766, [2M+Na]+; **4b**, C19H35N5O6S, m/z = 462.23868, calc 462.23808 [M+H]+, 484.22062, calc 484.22003 [M+Na]+; **5**, C16H30N4O4S, m/z = 375.20645, calc 375.20605 [M+H]+, 397.18834, calc 397.18800 [M+Na]+.

**Fig. S1** Time course of the photodecomposition of **1b**. Decrease of absorbance at 366 nm as a function of irradiation time, experimental values and their fitting to with for **irr = **det.

A = absorbance at t, A0 = absorbance at t = 0, I0 = intensity of the incident light, ** = molar absorption coefficient [mol-1*L*cm-1], d = optical path length [cm], V = sample volume [L], ** = quantum yield, k =.photochemical decomposition rate [s-1], **irr = radiation wavelength, **det = detection wavelength.
